# Supplementary material
Source: publisher figshare collection journal article supplement (https://tandf.figshare.com/ndownloader/files/21886560)
Supplement: Supplementary file 1 [file 21886560]

This supplemental appendix contains all stimuli used in the present studies. As can be seen, the present word lists in Tables A-G contain the German stimulus material. To illustrate the stimulus material and to promote future research, we included translations of (nearly) all word lists in the Tables H-N. To translate the word triads, we used the original list of word triads from Bowers, Regehr, Balthazard, & Parker, 1990. We started with the word lists used in Study 3a (Table K), because the authors Bolte, Kuhl, & Goschke (2003) used most of the original items for their word list. When translating the other word lists, we attempted to be as consistent as possible with the original list. However, many word triads were adapted in the different word lists resulting in inconsistent translations. We did not translate Table B, because this list consisted mostly of anagram words. Translating these words in English would be of no help for future research.

*Before using the lists in future research*, please note that the word triads all tend to have culture-specific elements. Some words convey only one meaning in English, but have multiple meanings in German and vice-versa. For instance, WEIN, QUELLE and KELLER could be translated as WINE, SPRING and CELLAR, but also as WINE, FOUNTAIN, and BASEMENT. Please note that the semantic relations between these words differ substantially. Moreover, semantic relations between the words are culture-specific. When we adapted the words from Fröhlich and Högl (2012), we accounted for these aspects. For instance, the original list contained the triad HAWAII, MISSOURI and BEACH. American students might have identified Hawaii and Missouri as U.S. territories with ease. Germans probably would not. Thus, the word lists fit primarily to a German cultural context. For future research, we encourage researchers to validate the word lists in the language of their study’s participants.

| *Table A: List of word triads used in Study 1.* | | | | | | | | | | |
| --- | --- | --- | --- | --- | --- | --- | --- | --- | --- | --- |
| List 1 | | | | |  | List 2 | | | | |
| Word 1 | Word 2 | Word 3 | Relation | Position |  | Word 1 | Word 2 | Word 3 | Relation | Position |
| Wein | Quelle | Champagner | Taxonomic | Third |  | Wein | Quelle | Keller | Thematic | Third |
| Salami | Splitter | Schweinekotelett | Taxonomic | Third |  | Salami | Splitter | Vegetarier | Thematic | Third |
| Diamantring | Tennis | Armband | Taxonomic | Third |  | Diamantring | Tennis | Altar | Thematic | Third |
| Dosenöffner | Kittel | Flaschenöffner | Taxonomic | Third |  | Dosenöffner | Kittel | Dose | Thematic | Third |
| Milch | Walzer | Limonade | Taxonomic | Third |  | Milch | Walzer | Kalzium | Thematic | Third |
| Virus | Glück | Bakterie | Taxonomic | Third |  | Virus | Glück | Arzt | Thematic | Third |
| Yacht | Club | Segelboot | Taxonomic | Third |  | Yacht | Club | Meer | Thematic | Third |
| Messer | Sinn | Pistole | Taxonomic | Third |  | Messer | Sinn | Kampf | Thematic | Third |
| Katze | Tasche | Löwe | Taxonomic | Third |  | Katze | Tasche | Wollknäuel | Thematic | Third |
| Pommes-frites | Haar | Kartoffelecken | Taxonomic | Third |  | Pommes-frites | Haar | Ketchup | Thematic | Third |
| Saxophon | Trompete | Knoten | Taxonomic | Second |  | Saxophon | Jazz | Knoten | Thematic | Second |
| Hot Dog | Döner | Donau | Taxonomic | Second |  | Hot Dog | Senf | Donau | Thematic | Second |
| Dämon | Geist | Manieren | Taxonomic | Second |  | Dämon | Besessenheit | Manieren | Thematic | Second |
| Polizeiauto | Feuerwehr-wagen | Schatten | Taxonomic | Second |  | Polizeiauto | Festnahme | Schatten | Thematic | Second |
| Spinne | Wespe | Wolke | Taxonomic | Second |  | Spinne | Witwe | Wolke | Thematic | Second |
| Kreide | Marker | Zigarette | Taxonomic | Second |  | Kreide | Straße | Zigarette | Thematic | Second |
| Tablette | Kapsel | Schnee | Taxonomic | Second |  | Tablette | Wasser | Schnee | Thematic | Second |
| Hollywood | Los Angeles | Frucht | Taxonomic | Second |  | Hollywood | Filmstar | Frucht | Thematic | Second |
| Pferd | Esel | Reiniger | Taxonomic | Second |  | Pferd | Reiterin | Reiniger | Thematic | Second |

| *Table A - Continued* | | | | | | | | | | |
| --- | --- | --- | --- | --- | --- | --- | --- | --- | --- | --- |
| List 1 | | | | |  | List 2 | | | | |
| Word 1 | Word 2 | Word 3 | Relation | Position |  | Word 1 | Word 2 | Word 3 | Relation | Position |
| Truthahn | Laden | USA | Thematic | Third |  | Truthahn | Laden | Gans | Taxonomic | Third |
| Flugzeug | Zitrone | Captain | Thematic | Third |  | Flugzeug | Zitrone | Auto | Taxonomic | Third |
| Bleistift | Benzin | Radiergummi | Thematic | Third |  | Bleistift | Benzin | Filzstift | Taxonomic | Third |
| Raub | Schneide | Bank | Thematic | Third |  | Raub | Schneide | Betrug | Taxonomic | Third |
| Gin | Nudel | Betrunkenheit | Thematic | Third |  | Gin | Nudel | Whisky | Taxonomic | Third |
| Pandabär | Praline | Tee | Thematic | Third |  | Pandabär | Praline | Grizzly | Taxonomic | Third |
| Kamel | Ampel | Düne | Thematic | Third |  | Kamel | Ampel | Dromedar | Taxonomic | Third |
| Orgel | Schädel | Kirche | Thematic | Third |  | Orgel | Schädel | Akkordeon | Taxonomic | Third |
| Schwimmen | Pinie | Taucherbrille | Thematic | Third |  | Schwimmen | Pinie | Golf | Taxonomic | Third |
| Gitterbett | Fenster | Baby | Thematic | Third |  | Gitterbett | Fenster | Wasserbett | Taxonomic | Third |
| Unfall | Standstreifen | Fußboden | Thematic | Second |  | Unfall | Missgeschick | Fußboden | Taxonomic | Second |
| Bier | Party | Hund | Thematic | Second |  | Bier | Cola | Hund | Taxonomic | Second |
| Biene | Wabe | Bühne | Thematic | Second |  | Biene | Fliege | Bühne | Taxonomic | Second |
| Kloster | Buch | Gas | Thematic | Second |  | Kloster | Dom | Gas | Taxonomic | Second |
| König | Kronjuwelen | Laken | Thematic | Second |  | König | Präsident | Laken | Taxonomic | Second |
| Tortilla-Chips | Salsa | Händler | Thematic | Second |  | Tortilla-Chips | Kartoffel-Chips | Händler | Taxonomic | Second |
| Hawaii | Strand | Sessel | Thematic | Second |  | Hawaii | Fidschi | Sessel | Taxonomic | Second |
| Vase | Rose | Dauer | Thematic | Second |  | Vase | Glas | Dauer | Taxonomic | Second |
| Iglu | Eskimo | Nuss | Thematic | Second |  | Iglu | Haus | Nuss | Taxonomic | Second |

*Notes.* Position indicates the position of the word that was related to the first word. Word triads were presented in a pseudorandomized order.

| *Table B. Adapted word list presented in the thematic preference task (Study 2).* | | | | |
| --- | --- | --- | --- | --- |
| No | Target Word | Thematic Relation | Taxonomic Relation | Position |
| 1 | Saxophon | Jazz | Trompete | left |
| 2 | Salami | Vegetarier | Schweinekotelett | left |
| 3 | Unfall | Standstreifen | Missgeschick | left |
| 4 | Hot Dog | Senf | Döner | left |
| 5 | Dämon | Besessenheit | Geist | left |
| 6 | Polizeiauto | Festnahme | Feuerwehrwagen | left |
| 7 | Spinne | Witwe | Wespe | left |
| 8 | Bier | Party | Cola | left |
| 9 | Biene | Wabe | Fliege | left |
| 10 | Gin | Betrunkenheit | Whisky | left |
| 11 | Kloster | Buch | Dom | left |
| 12 | Pandabär | Tee | Grizzly | left |
| 13 | König | Kronjuwelen | Präsident | left |
| 14 | Kreide | Straße | Marker | left |
| 15 | Tablette | Wasser | Kapsel | left |
| 16 | Tortilla-Chips | Kartoffel-Chips | Salsa | left |
| 17 | Hawaii | Strand | Fidschi | left |
| 18 | Vase | Rose | Glas | left |
| 19 | Hollywood | Filmstar | Los Angeles | left |
| 20 | Pferd | Reiterin | Esel | left |
| 21 | Iglu | Eskimo | Haus | left |
| 22 | Wein | Keller | Champagner | right |
| 23 | Truthahn | USA | Gans | right |
| 24 | Diamantring | Altar | Armband | right |
| 25 | Dosenöffner | Dose | Flaschenöffner | right |
| 26 | Milch | Kalzium | Limonade | right |
| 27 | Virus | Arzt | Bakterie | right |
| 28 | Flugzeug | Kapitän | Auto | right |
| 29 | Bleistift | Radiergummi | Filzstift | right |
| 30 | Raub | Bank | Betrug | right |
| 31 | Yacht | Meer | Segelboot | right |
| 32 | Kamel | Düne | Dromedar | right |
| 33 | Messer | Kampf | Pistole | right |
| 34 | Katze | Wollknäuel | Löwe | right |
| 35 | Orgel | Kirche | Akkordeon | right |
| 36 | Schwimmen | Taucherbrille | Golf | right |
| 37 | Gitterbett | Baby | Wasserbett | right |
| 38 | Kellnerin | Restaurant | Friseurin | right |
| 39 | Pommes-frites | Ketchup | Kartoffelecken | right |

*Notes*. Position indicates the position of the thematically related word in the experiment. The related words were presented below the target word.

| *Table B.* *Anagram task (Study 2)* | | | |
| --- | --- | --- | --- |
| No | Target Word | Thematic Anagram | Taxonomic Anagram |
| 1 | Salami | Vegrteiaer | Sctehnzil |
| 2 | Virus | Azrt | Bateirke |
| 3 | Yacht | Mree | Selegobot |
| 4 | Messer | Kmpaf | Posltie |
| 5 | Flugzeug | Ploit | Atuo |
| 6 | Vase | Rsoe | Gals |
| 7 | Kreide | Sßatre | Maerkr |
| 8 | Raub | Bertug | Bnak |
| 9 | Tablette | Wssaer | Kpsael |
| 10 | Katze | Wlloknuäel | Lwöe |
| 11 | Biene | Wbae | Fiegle |
| 12 | Pferd | Rieteirn | Eesl |
| 13 | Gitterbett | Bbay | Waerssebtt |
| 14 | Bier | Ptary | Cloa |
| 15 | Hot Dog | Snef | Deönr |
| 16 | Kellnerin | Rsteraunat | Fireusirn |
| 17 | Wein | Kleler | Chmagnpaer |
| 18 | Saxophon | Jzaz | Topetrme |
| 19 | Milch | Kazluim | Lianmode |
| 20 | Plastikflasche | Pnfad | Glsafasclhe |
| 21 | Saft | Osbt | Fnata |
| 22 | Kissen | Scalhf | Dceke |
| 23 | Foto | Kmarea | Blid |
| 24 | Tulpe | Gißeankne | Nleke |
| 25 | Lehrer | Ntoe | Mlaer |
| 26 | Füller | Tnite | Bnudstfit |
| 27 | Wolf | Ruedl | Tgier |
| 28 | Hotel | Gsat | Feerinahus |
| 29 | Schlucht | Stien | Abahng |
| 30 | Klavier | Tstae | Gutirrae |
| 31 | Brot | Tieg | Bauegtte |
| 32 | Sommer | Htzie | Wntier |
| 33 | Lampe | Lciht | Ltanere |
| 34 | Wunde | Plaftser | Vretzlenug |
| 35 | Koffer | Rseie | Rcksucak |
| 36 | Bürste | Harae | Kmam |
| 37 | Fisch | Aqauiurm | Qalule |
| 38 | Münster | Farhard | Klön |
| 39 | Universität | Stdunet | Scluhe |
| 40 | Tänzer | Wazelr | Snäegr |
| *Notes.* The target words and anagrams 1-20 were derived from the preference task. | | | |

| *Table C: Word triads used in the semantic coherence task (Study 2)* | | | | |
| --- | --- | --- | --- | --- |
| No | Coherence | Word 1 | Word 2 | Word 3 |
| 1 | No | Stuhl | Donner | Stange |
| 2 | No | Spiegel | warm | Deckel |
| 3 | No | Garten | Trompete | Schild |
| 4 | No | Karte | Stoff | Eis |
| 5 | No | Bauch | Kreuz | Detektiv |
| 6 | No | Wasser | Telefon | Rücken |
| 7 | No | Sand | Predigt | Krone |
| 8 | No | Seide | Spritze | rot |
| 9 | No | Tanz | Golf | Schein |
| 10 | No | Quelle | langweilig | Ampel |
| 11 | No | Land | Fall | Sohn |
| 12 | No | Gedicht | Geld | Staub |
| 13 | No | Dauer | trödeln | Frucht |
| 14 | No | Stärke | Münze | klar |
| 15 | No | Gummi | Himmel | Nacht |
| 16 | No | Musik | Pappe | Herren |
| 17 | No | Nudel | Sessel | basteln |
| 18 | No | Glück | Benzin | Bank |
| 19 | No | schlurfen | Händler | Knoten |
| 20 | No | Schlüssel | Kartoffel | Auge |
| 21 | No | Frau | Ozean | Sahne |
| 22 | No | Reiniger | Nuss | Kinder |
| 23 | No | Schalter | Kopf | Ring |
| 24 | No | rein | Brett | Löffel |
| 25 | No | Laken | Zigarette | Schnee |
| 26 | No | stopfen | Salz | Zeit |
| 27 | No | Haus | fliegen | Träne |
| 28 | No | Drucker | Erklärung | Öl |
| 29 | No | Manieren | weich | Schatten |
| 30 | No | frei | kehren | Schneide |
| 31 | No | Zeichen | Kohl | strecken |
| 32 | No | Haar | Club | blind |
| 33 | Yes | Schalter | Quelle | Strahl |
| 34 | Yes | Knoten | Wurm | Nudel |
| 35 | Yes | Pappe | Praline | Zigarette |
| 36 | Yes | Dauer | Ozean | Donau |
| 37 | Yes | Kittel | Sahne | Wolke |
| 38 | Yes | Wasser | stopfen | Detektiv |
| 39 | Yes | Arm | Tasche | Zeit |
| 40 | Yes | Schmerz | Ball | Kohl |
| 41 | Yes | Wand | blind | Öl |
| 42 | Yes | Schneide | Sinn | langweilig |
| 43 | Yes | Löwe | Sohn | Karte |
| 44 | Yes | Faden | Pinie | Spritze |
| 45 | Yes | Manieren | Bein | Tennis |
| 46 | Yes | lesen | Telefon | Club |
| 47 | Yes | Schädel | Hund | Splitter |
| 48 | Yes | Salz | Jungfrau | Frucht |

| *Table C - Continued* | | | | |
| --- | --- | --- | --- | --- |
| No | Coherence | Word 1 | Word 2 | Word 3 |
| 49 | Yes | kehren | Sessel | warm |
| 50 | Yes | Haus | Spur | weich |
| 51 | Yes | rein | Feuer | Fall |
| 52 | Yes | Kopf | Träne | Höhle |
| 53 | Yes | fliegen | Schloss | Laken |
| 54 | Yes | Treffer | Kinder | Brett |
| 55 | Yes | Felsen | Nuss | Stahl |
| 56 | Yes | Stift | Kreuz | Herz |
| 57 | Yes | Benzin | Spiegel | Schild |
| 58 | Yes | Atem | Haar | strecken |
| 59 | Yes | Seide | Eis | eben |
| 60 | Yes | Stoff | Sand | Kartoffel |
| 61 | Yes | Münze | Löffel | Ring |
| 62 | Yes | Deckel | Garten | Bauch |
| 63 | Yes | Geld | Stuhl | Nacht |
| 64 | Yes | Holz | Frau | Meister |

| *Table D.* *Word triads and thematic relatedness of data set A (Study 3).* | | | | | | | | | |
| --- | --- | --- | --- | --- | --- | --- | --- | --- | --- |
| Word Triad | | | | |  | Thematic Relatedness of Word Pair | | | |
| No | Word 1 | Word 2 | Word 3 | Denominator |  | 1 & 2 | 1 & 3 | 2 & 3 | Mean |
| 1 | Ziege | hoch | grün | Yes |  | 1.12 | 1.18 | 1.16 | 1.15 |
| 2 | zerbrochen | klar | Auge | Yes |  | 1.04 | 1.02 | 2.22 | 1.43 |
| 3 | Zeit | Haar | strecken | Yes |  | 1.28 | 1.40 | .64 | 1.11 |
| 4 | Vogel | Seiten | Butter | Yes |  | .30 | .32 | .46 | .36 |
| 5 | trödeln | gehen | Sirup | Yes |  | 2.40 | .34 | .24 | .99 |
| 6 | trocken | Kopf | Hund | Yes |  | 1.28 | 1.00 | 1.50 | 1.26 |
| 7 | Treffer | Gleichstand | Tennis | Yes |  | 2.40 | 2.52 | 2.60 | 2.51 |
| 8 | Tönung | Haar | Öl | Yes |  | 2.86 | 1.52 | 2.36 | 2.25 |
| 9 | Tinte | Kreuz | Herz | Yes |  | 1.24 | 1.82 | 2.08 | 1.71 |
| 10 | Stoff | elend | Kartoffel | Yes |  | .66 | .60 | .68 | .65 |
| 11 | Stein | Tür | Straße | Yes |  | 1.18 | 2.44 | 1.64 | 1.75 |
| 12 | spielen | Kredit | Gruß | Yes |  | 1.36 | 1.08 | .46 | .97 |
| 13 | Seide | Eis | eben | Yes |  | .40 | .94 | .78 | .71 |
| 14 | Schneide | Amputation | langweilig | Yes |  | 1.94 | .40 | .20 | .85 |
| 15 | Schmerz | Jäger | Kohl | Yes |  | 2.06 | .30 | .58 | .98 |
| 16 | Schein | Laden | Händler | Yes |  | 1.40 | 1.72 | 2.86 | 1.99 |
| 17 | Sandwich | Golf | Herren | Yes |  | .78 | 1.00 | 2.46 | 1.41 |
| 18 | Salz | Tief | Gischt | Yes |  | 1.26 | 1.80 | 1.46 | 1.51 |
| 19 | Rohr | Holz | heiß | Yes |  | .96 | 1.72 | 1.68 | 1.45 |
| 20 | Riemen | Tasche | Zeit | Yes |  | 2.54 | .60 | .92 | 1.35 |
| 21 | rein | blau | Fall | Yes |  | 1.38 | 1.62 | .60 | 1.20 |
| 22 | Rechteck | Telefon | Club | Yes |  | 1.06 | .78 | .88 | .91 |
| 23 | Pappe | Quadrat | offen | Yes |  | 1.74 | .76 | .36 | .95 |
| 24 | Manieren | rund | Tennis | Yes |  | .50 | 1.08 | 2.32 | 1.30 |
| 25 | Magie | Plüsch | Fußboden | Yes |  | .94 | .40 | 1.64 | .99 |
| 26 | leer | weiß | Linien | Yes |  | 1.70 | .80 | 1.30 | 1.27 |
| 27 | laut | Trompete | Atom | Yes |  | 2.86 | .90 | .36 | 1.37 |
| 28 | Kirche | Licht | Geburtstag | Yes |  | 2.06 | 1.20 | 1.78 | 1.68 |
| 29 | Kaninchen | Wolke | Sahne | Yes |  | .90 | .32 | 1.60 | .94 |
| 30 | groß | Blatt | Schatten | Yes |  | 1.08 | 1.60 | 1.60 | 1.43 |
| 31 | Geld | Stuhl | Kellner | Yes |  | .82 | 2.56 | 1.90 | 1.76 |
| 32 | Fuß | Schnee | Tanz | Yes |  | 1.60 | 2.70 | 1.50 | 1.93 |
| 33 | Felsen | Ware | Stahl | Yes |  | .34 | 1.30 | 1.60 | 1.08 |
| 34 | Faß | Garten | Bauch | Yes |  | 1.36 | 1.86 | .84 | 1.35 |
| 35 | Faden | Pinie | Schmerz | Yes |  | .48 | 1.24 | .26 | .66 |
| 36 | Engpass | Flug | hochwerfen | Yes |  | 1.14 | .72 | 1.78 | 1.21 |
| 37 | Wolke | Blatt | Pfand | No |  | .98 | .38 | .58 | .65 |
| 38 | Ware | Kehle | gehen | No |  | .26 | 1.00 | .34 | .53 |
| 39 | Vogel | Rohr | Straße | No |  | .54 | 1.28 | 1.56 | 1.13 |
| 40 | anhalten | Tür | Sahne | No |  | 1.42 | .24 | .18 | .61 |
| 41 | Trompete | Badewanne | Kredit | No |  | .24 | .48 | .26 | .33 |
| 42 | trocken | Laden | Tennis | No |  | .66 | .74 | .86 | .75 |
| 43 | traurig | Münze | eben | No |  | .52 | .38 | .52 | .47 |
| 44 | Traum | Ball | Buch | No |  | .86 | 1.90 | .74 | 1.17 |
| 45 | Stadt | Wurzel | Auto | No |  | 1.02 | 2.52 | .34 | 1.29 |
| 46 | Seide | Stein | Ziege | No |  | .56 | .52 | 1.40 | .83 |
| 47 | schwer | Farben | Stoß | No |  | .58 | 1.54 | .44 | .85 |
| 48 | Schwan | Armee | Maske | No |  | .32 | 1.32 | 1.82 | 1.15 |

| *Table D- Continued* | | | | | | | | | |
| --- | --- | --- | --- | --- | --- | --- | --- | --- | --- |
| Word Triad | | | | |  | Thematic Relatedness of Word Pair | | | |
| No | Word 1 | Word 2 | Word 3 | Denominator |  | 1 & 2 | 1 & 3 | 2 & 3 | Mean |
| 49 | schlau | heiß | strecken | No |  | .92 | .56 | .70 | .73 |
| 50 | ruhig | Seiten | Musik | No |  | 1.32 | 2.20 | 2.04 | 1.85 |
| 51 | Party | rund | Mark | No |  | .92 | .86 | 1.70 | 1.16 |
| 52 | Nagel | Faden | spielen | No |  | 1.26 | .64 | 1.44 | 1.11 |
| 53 | Messer | Fuß | Schachtel | No |  | .76 | 1.00 | .78 | .85 |
| 54 | Magie | bellen | Kredit | No |  | .34 | .54 | .18 | .35 |
| 55 | Mädchen | sozial | Horn | No |  | 2.24 | .56 | .28 | 1.03 |
| 56 | Liebe | Boden | Schmerz | No |  | .72 | 2.70 | 1.38 | 1.60 |
| 57 | Licht | Volk | Kopf | No |  | .90 | 1.32 | 1.40 | 1.21 |
| 58 | Lärm | Rauch | Schatten | No |  | 1.66 | .78 | 1.42 | 1.29 |
| 59 | Kopf | sehen | Träne | No |  | 2.30 | 2.06 | 2.08 | 2.15 |
| 60 | klar | rollen | Macht | No |  | .34 | 1.10 | .80 | .75 |
| 61 | Kekse | leer | Zügel | No |  | 1.90 | .34 | .32 | .85 |
| 62 | Haus | Löwe | Butter | No |  | .52 | .94 | .14 | .53 |
| 63 | Gürtel | Handel | Nase | No |  | 1.30 | .34 | .42 | .69 |
| 64 | groß | Haar | Schotte | No |  | .84 | .92 | .88 | .88 |
| 65 | Gold | Cracker | Rad | No |  | .54 | .76 | .38 | .56 |
| 66 | Führer | Schere | weiß | No |  | .50 | .62 | .78 | .63 |
| 67 | fröhlich | Schwein | Engel | No |  | 1.34 | 2.04 | .52 | 1.30 |
| 68 | Finger | sprechen | Wurm | No |  | 1.22 | 1.14 | .32 | .89 |
| 69 | Deck | Schemel | Tasche | No |  | .48 | .58 | .60 | .55 |
| 70 | Bonbons | Giebel | Stadt | No |  | .28 | .90 | 1.40 | .86 |
| 71 | Bewegung | blau | Tasche | No |  | .68 | 1.02 | 1.18 | .96 |
| 72 | Vogel | Hering | Dampf | No |  | 1.46 | .54 | .98 | .99 |

| *Table E.* *Word triads and thematic relatedness of data set B (Study 3).* | | | | | | | | | |
| --- | --- | --- | --- | --- | --- | --- | --- | --- | --- |
| Word Triad | | | | |  | Thematic Relatedness of Word Pair | | | |
| No | Word 1 | Word 2 | Word 3 | Denominator |  | 1 & 2 | 1 & 3 | 2 & 3 | Mean |
| 1 | Ziege | hoch | grün | Yes |  | 1.12 | 1.18 | 1.16 | 1.15 |
| 2 | Tönung | Haar | Öl | Yes |  | 2.86 | 1.52 | 2.36 | 2.25 |
| 3 | Pappe | Quadrat | offen | Yes |  | 1.74 | .76 | .36 | .95 |
| 4 | leer | weiß | Linien | Yes |  | 1.70 | .80 | 1.30 | 1.27 |
| 5 | Schein | Laden | Händler | Yes |  | 1.40 | 1.72 | 2.86 | 1.99 |
| 6 | groß | Blatt | Schatten | Yes |  | 1.08 | 1.6 | 1.60 | 1.43 |
| 7 | Seide | Eis | eben | Yes |  | .40 | .94 | .78 | .71 |
| 8 | Kirche | Licht | Geburtstag | Yes |  | 2.06 | 1.20 | 1.78 | 1.68 |
| 9 | Blume | Wachs | gelb | Yes |  | .89 | 1.96 | 1.68 | 1.51 |
| 10 | Kaninchen | Wolke | Sahne | Yes |  | .90 | .32 | 1.60 | .94 |
| 11 | zerbrochen | klar | Auge | Yes |  | 1.04 | 1.02 | 2.22 | 1.43 |
| 12 | Faß | Garten | Bauch | Yes |  | 1.36 | 1.86 | .84 | 1.35 |
| 13 | Nase | Finger | Taschentuch | Yes |  | 1.61 | 2.93 | 1.04 | 1.86 |
| 14 | Papier | Party | Locher | Yes |  | .79 | 2.50 | .11 | 1.13 |
| 15 | Bleistift | Papier | Blume | Yes |  | 2.82 | .36 | 1.14 | 1.44 |
| 16 | Duft | Rot | Blume | Yes |  | 1.00 | 2.75 | 2.11 | 1.95 |
| 17 | Holz | Glas | Rahmen | Yes |  | 1.21 | 2.32 | 1.54 | 1.69 |
| 18 | Musik | Menschen | Ticket | Yes |  | 2.46 | 1.89 | 1.50 | 1.95 |
| 19 | grün | Nadel | Kerze | Yes |  | .93 | .82 | .54 | .76 |
| 20 | Feuer | Wasser | rot | Yes |  | 2.32 | 2.82 | .29 | 1.81 |
| 21 | Schminke | Vorhang | Applaus | Yes |  | 1.46 | 1.36 | 2.5 | 1.77 |
| 22 | Salz | Löffel | Huhn | Yes |  | 1.43 | 1.04 | .68 | 1.05 |
| 23 | Gras | Tisch | Sommer | Yes |  | .39 | 2.50 | 1.18 | 1.36 |
| 24 | Wolle | weich | Wäsche | Yes |  | 2.71 | 2.46 | 2.39 | 2.52 |
| 25 | Kugel | Schere | Nase | No |  | .25 | .39 | .25 | .30 |
| 26 | Schere | Rohr | Pfeil | No |  | .32 | .68 | .54 | .51 |
| 27 | Nase | Blume | Papier | No |  | 2.04 | .57 | 1.11 | 1.24 |
| 28 | Duft | Locher | Finger | No |  | .04 | .61 | .50 | .38 |
| 29 | Locher | Glas | Rot | No |  | .07 | .57 | .89 | .51 |
| 30 | Roher | Ticket | Butter | No |  | .07 | .14 | .04 | .08 |
| 31 | gelb | Straße | Holz | No |  | .36 | .64 | .50 | .50 |
| 32 | Wasser | Kerze | Musik | No |  | .89 | .89 | 1.57 | 1.12 |
| 33 | Vorhang | Wasser | gelb | No |  | .29 | .75 | .25 | .43 |
| 34 | Löffel | Ticket | Löwe | No |  | .04 | .11 | .36 | .17 |
| 35 | Uhr | Tisch | Gras | No |  | .96 | .18 | .54 | .56 |
| 36 | Sommer | sprechen | eben | No |  | .75 | .29 | .43 | .49 |
| 37 | Vogel | Rohr | Straße | No |  | .54 | 1.28 | 1.56 | 1.13 |
| 38 | Vogel | Hering | Dampf | No |  | 1.46 | .54 | .98 | .99 |
| 39 | Stadt | Wurzel | Auto | No |  | 1.02 | 2.52 | .34 | 1.29 |
| 40 | Mädchen | sozial | Horn | No |  | 2.24 | .56 | .28 | 1.03 |
| 41 | Haus | Löwe | Butter | No |  | .52 | .94 | .14 | .53 |
| 42 | Finger | sprechen | Wurm | No |  | 1.22 | 1.14 | .32 | .89 |
| 43 | anhalten | Tür | Sahne | No |  | 1.42 | .24 | .18 | .61 |
| 44 | Nagel | Faden | spielen | No |  | 1.26 | .64 | 1.44 | 1.11 |
| 45 | Kekse | leer | Zügel | No |  | 1.9 | .34 | .32 | .85 |
| 46 | Bewegung | blau | Tasche | No |  | .68 | 1.02 | 1.18 | .96 |
| 47 | traurig | Münze | eben | No |  | .52 | .38 | .52 | .47 |
| 48 | Magie | bellen | Kredit | No |  | .34 | .54 | .18 | .35 |

| *Table F.* *Word triads and thematic relatedness of data set C (Study 3).* | | | | | | | | | |
| --- | --- | --- | --- | --- | --- | --- | --- | --- | --- |
| Word Triad | | | | |  | Thematic Relatedness of Word Pair | | | | |
| No | Word 1 | Word 2 | Word 3 | Denominator |  | 1 & 2 | 1 & 3 | 2 & 3 | Mean | |
| 1 | Ziege | Rücken | Predigt | Yes |  | 2.42 | .71 | .44 | 1.19 | |
| 2 | Salz | Jungfrau | Frucht | Yes |  | .23 | .88 | 1.33 | .81 | |
| 3 | Wand | blind | Öl | Yes |  | .48 | .88 | .21 | .52 | |
| 4 | Pappe | Praline | Zigarette | Yes |  | .85 | .85 | 1.42 | 1.04 | |
| 5 | basteln | leer | Drucker | Yes |  | .48 | 1.50 | 2.21 | 1.40 | |
| 6 | Schein | Laden | Händler | Yes |  | .92 | 1.31 | 2.92 | 1.72 | |
| 7 | Krone | Gummi | Schatten | Yes |  | .35 | .71 | .19 | .42 | |
| 8 | Seide | Eis | eben | Yes |  | .48 | .71 | .54 | .58 | |
| 9 | Reiniger | Plüsch | Fußboden | Yes |  | .77 | 2.60 | 1.04 | 1.47 | |
| 10 | Kittel | Sahne | Wolke | Yes |  | .73 | .42 | 1.50 | .88 | |
| 11 | Krise | Gas | heiß | Yes |  | 1.63 | 1.19 | 1.88 | 1.57 | |
| 12 | lesen | Telefon | Club | Yes |  | .90 | 1.21 | .71 | .94 | |
| 13 | Ampel | Seiten | Zitrone | Yes |  | .94 | .48 | .23 | .55 | |
| 14 | trödeln | schlurfen | Walzer | Yes |  | 2.27 | .71 | 1.15 | 1.38 | |
| 15 | Wein | klar | Auge | Yes |  | 1.38 | .42 | 2.08 | 1.29 | |
| 16 | Deckel | Garten | Bauch | Yes |  | .31 | .44 | .42 | .39 | |
| 17 | rein | Feuer | Fall | Yes |  | .81 | 1.40 | .44 | .88 | |
| 18 | Holz | Frau | Meister | Yes |  | .54 | 1.71 | 1.29 | 1.18 | |
| 19 | Manieren | Bein | Tennis | Yes |  | .40 | .83 | 1.31 | .85 | |
| 20 | Arm | Tasche | Zeit | Yes |  | 1.79 | .52 | .60 | .97 | |
| 21 | Atem | Haar | strecken | Yes |  | .83 | .94 | .48 | .75 | |
| 22 | Fuß | Schnee | Tanz | Yes |  | 1.52 | 2.63 | 1.13 | 1.76 | |
| 23 | Schädel | Hund | Splitter | Yes |  | 1.35 | 1.48 | .50 | 1.11 | |
| 24 | Felsen | Nuss | Stahl | Yes |  | .81 | 1.19 | .56 | .85 | |
| 25 | Schneide | Sinn | langweilig | Yes |  | .35 | .21 | 1.10 | .55 | |
| 26 | Geld | Stuhl | Nacht | Yes |  | .65 | .67 | .50 | .61 | |
| 27 | Land | Kredit | rot | Yes |  | 1.60 | .58 | 1.48 | 1.22 | |
| 28 | Faden | Pinie | Spritze | Yes |  | .19 | .79 | .31 | .43 | |
| 29 | Stärke | Trompete | Donner | Yes |  | 1.31 | 2.21 | 1.44 | 1.65 | |
| 30 | Schmerz | Ball | Kohl | Yes |  | 1.29 | .15 | .96 | .80 | |
| 31 | feiern | Golf | Herren | Yes |  | .73 | 1.10 | 1.92 | 1.25 | |
| 32 | Treffer | Kinder | Brett | Yes |  | 1.06 | 1.10 | .85 | 1.00 | |
| 33 | Stoff | Sand | Kartoffel | Yes |  | .71 | .42 | .44 | .52 | |
| 34 | Stift | Kreuz | Herz | Yes |  | .88 | .67 | 1.75 | 1.10 | |
| 35 | Stange | Fenster | Bühne | Yes |  | 1.33 | 1.54 | 1.15 | 1.34 | |
| 36 | fliegen | Schloss | Laken | Yes |  | 1.04 | .81 | .46 | .77 | |
| 37 | Wasser | stopfen | Detektiv | Yes |  | .60 | .29 | .38 | .42 | |
| 38 | Dauer | Ozean | Donau | Yes |  | 1.02 | .46 | 1.96 | 1.15 | |
| 39 | Haus | Spur | weich | Yes |  | .73 | .23 | .48 | .48 | |
| 40 | kehren | Sessel | warm | Yes |  | .27 | .33 | 1.96 | .85 | |
| 41 | Schalter | Quelle | Strahl | Yes |  | .90 | .56 | 1.48 | .98 | |
| 42 | Staub | Himmel | Zeichen | Yes |  | 1.17 | 1.10 | 1.90 | 1.39 | |
| 43 | Knoten | Wurm | Nudel | Yes |  | .85 | 1.00 | 1.15 | 1.00 | |
| 44 | Münze | Löffel | Ring | Yes |  | .75 | 1.50 | .79 | 1.01 | |
| 45 | Benzin | Spiegel | Schild | Yes |  | .56 | .88 | 1.15 | .86 | |
| 46 | Kopf | Träne | Höhle | Yes |  | 1.81 | .69 | .58 | 1.03 | |
| 47 | Löwe | Sohn | Karte | Yes |  | 1.25 | .31 | .40 | .65 | |
| 48 | Bank | Musik | Schlüssel | Yes |  | .54 | 1.40 | 1.96 | 1.30 | |

| *Table F- continued.* | | | | | | | | | |
| --- | --- | --- | --- | --- | --- | --- | --- | --- | --- |
| Word Triad | | | | |  | Thematic Relatedness of Word Pair | | | | |
| No | Word 1 | Word 2 | Word 3 | Denominator |  | 1 & 2 | 1 & 3 | 2 & 3 | Mean | |
| 49 | Erklärung | Gedicht | Glück | Yes |  | 1.56 | .85 | 1.81 | 1.41 | |
| 50 | Warnung | frei | Drang | Yes |  | .88 | 1.21 | 1.79 | 1.29 | |
| 51 | Splitter | Laden | Tennis | No |  | .29 | .21 | .54 | .35 | |
| 52 | Kittel | Walzer | Schädel | No |  | .21 | .73 | .17 | .37 | |
| 53 | Glück | Benzin | Bank | No |  | .40 | 1.06 | .69 | .72 | |
| 54 | frei | kehren | Schneide | No |  | .73 | .50 | .29 | .51 | |
| 55 | Quelle | langweilig | Ampel | No |  | .27 | .10 | 1.27 | .55 | |
| 56 | Sinn | Tasche | Zitrone | No |  | .17 | .27 | .10 | .18 | |
| 57 | Arm | Pinie | Fenster | No |  | .23 | .63 | .46 | .44 | |
| 58 | Haar | Club | blind | No |  | .73 | .38 | .38 | .50 | |
| 59 | schlurfen | Händler | Knoten | No |  | .52 | .25 | .56 | .44 | |
| 60 | Fußboden | Feuer | Donau | No |  | .77 | .10 | .33 | .40 | |
| 61 | Manieren | weich | Schatten | No |  | .56 | .25 | .83 | .55 | |
| 62 | Wolke | Hund | feiern | No |  | .46 | .48 | .29 | .41 | |
| 63 | Bühne | Gas | Praline | No |  | .35 | .48 | .06 | .30 | |
| 64 | Laken | Zigarette | Schnee | No |  | .46 | .96 | .29 | .57 | |
| 65 | Nudel | Sessel | basteln | No |  | .21 | .63 | .58 | .47 | |
| 66 | Dauer | trödeln | Frucht | No |  | 2.31 | .79 | .17 | 1.09 | |
| 67 | Reiniger | Nuss | Kinder | No |  | .25 | .73 | .69 | .56 | |
| 68 | stopfen | Salz | Zeit | No |  | .40 | .79 | .50 | .56 | |
| 69 | Faden | Löwe | Krise | No |  | .17 | .48 | .35 | .33 | |
| 70 | Gummi | Himmel | Nacht | No |  | .19 | .75 | 2.56 | 1.17 | |
| 71 | Drang | Stahl | Ziege | No |  | .54 | .29 | .19 | .34 | |
| 72 | Schlüssel | Kartoffel | Auge | No |  | .52 | .44 | .54 | .50 | |
| 73 | Frau | Ozean | Sahne | No |  | .85 | .79 | .19 | .61 | |
| 74 | Garten | Trompete | Schild | No |  | .29 | .88 | .29 | .49 | |
| 75 | Wasser | Telefon | Rücken | No |  | .27 | .90 | .21 | .46 | |
| 76 | rein | Brett | Löffel | No |  | .35 | .81 | .67 | .61 | |
| 77 | Seide | Spritze | rot | No |  | .35 | 1.44 | 1.67 | 1.15 | |
| 78 | Felsen | Plüsch | leer | No |  | .27 | .42 | .27 | .32 | |
| 79 | Bauch | Kreuz | Detektiv | No |  | .65 | .75 | .52 | .64 | |
| 80 | Spiegel | warm | Deckel | No |  | .25 | .60 | 1.33 | .73 | |
| 81 | Stuhl | Donner | Stange | No |  | .33 | .77 | .35 | .48 | |
| 82 | Schloss | Seiten | Bein | No |  | .46 | .15 | .42 | .34 | |
| 83 | Ball | Wein | Wurm | No |  | .75 | .10 | .31 | .39 | |
| 84 | Meister | Schmerz | eben | No |  | .56 | .15 | .29 | .33 | |
| 85 | Atem | Kredit | Holz | No |  | .38 | .40 | .25 | .34 | |
| 86 | Zeichen | Kohl | strecken | No |  | 1.13 | .48 | .23 | .61 | |
| 87 | Stärke | Münze | klar | No |  | .65 | .88 | .27 | .60 | |
| 88 | Karte | Stoff | Eis | No |  | .56 | 1.27 | .58 | .80 | |
| 89 | Sand | Predigt | Krone | No |  | .38 | .50 | .94 | .61 | |
| 90 | Treffer | Warnung | Spur | No |  | 1.10 | 1.58 | 1.50 | 1.39 | |
| 91 | Herz | lesen | heiß | No |  | 1.23 | 1.81 | .52 | 1.19 | |
| 92 | Strahl | Jungfrau | Wand | No |  | .27 | .77 | .17 | .40 | |
| 93 | Gedicht | Geld | Staub | No |  | .71 | .60 | .58 | .63 | |
| 94 | Haus | fliegen | Träne | No |  | .46 | .44 | .67 | .52 | |

| *Table F- continued.* | | | | | | | | | |
| --- | --- | --- | --- | --- | --- | --- | --- | --- | --- |
| Word Triad | | | | |  | Thematic Relatedness of Word Pair | | | |
| No | Word 1 | Word 2 | Word 3 | Denominator |  | 1 & 2 | 1 & 3 | 2 & 3 | Mean |
| 95 | Fuß | Stift | Höhle | No |  | .21 | .58 | .31 | .37 |
| 96 | Musik | Pappe | Herren | No |  | .29 | .94 | .23 | .49 |
| 97 | Drucker | Erklärung | Öl | No |  | .98 | .31 | .17 | .49 |
| 98 | Land | Fall | Sohn | No |  | .73 | 1.00 | .48 | .74 |
| 99 | Tanz | Golf | Schein | No |  | 1.02 | .88 | .96 | .95 |
| 100 | Schalter | Kopf | Ring | No |  | 1.06 | .35 | .65 | .69 |

| *Table G.* *Word triads of the two triad lists (Study 4).* | | | | | | | | |
| --- | --- | --- | --- | --- | --- | --- | --- | --- |
|  |  | Control Triad List | | |  | Manipulated Triad List | | | |
| No | Deno-minator | Word 1 | Word 2 | Word 3 |  | Word 1 | Word 2 | Word 3 | |
| 1 | No | Atem | Kredit | Holz |  | Bauch | Kreuz | Detektiv | |
| 2 | No | Faden | Löwe | Krise |  | Dauer | trödeln | Frucht | |
| 3 | No | Frau | Ozean | Sahne |  | Frau | Ozean | Sahne | |
| 4 | No | Fußboden | Feuer | Donau |  | Gedicht | Geld | Staub | |
| 5 | No | Garten | Trompete | Schild |  | Glück | Benzin | Bank | |
| 6 | No | Gedicht | Geld | Staub |  | Gummi | Himmel | Nacht | |
| 7 | No | Karte | Stoff | Eis |  | Herz | lesen | heiß | |
| 8 | No | Kittel | Walzer | Schädel |  | Karte | Stoff | Eis | |
| 9 | No | Laken | Zigarette | Schnee |  | Land | Fall | Sohn | |
| 10 | No | Land | Fall | Sohn |  | rein | Brett | Löffel | |
| 11 | No | Manieren | weich | Schatten |  | Sand | Predigt | Krone | |
| 12 | No | Schloss | Seiten | Bein |  | Schalter | Kopf | Ring | |
| 13 | No | Schlüssel | Kartoffel | Auge |  | Seide | Spritze | rot | |
| 14 | No | Sinn | Tasche | Zitrone |  | Spiegel | warm | Deckel | |
| 15 | No | Splitter | Laden | Tennis |  | Stärke | Münze | klar | |
| 16 | No | stopfen | Salz | Zeit |  | Tanz | Golf | Schein | |
| 17 | No | Strahl | Jungfrau | Wand |  | Treffer | Warnung | Spur | |
| 18 | No | Wolke | Hund | feiern |  | Zeichen | Kohl | strecken | |
| 19 | Yes | Atem | Haar | strecken |  | Ampel | Seiten | Zitrone | |
| 20 | Yes | basteln | leer | Drucker |  | Atem | Haar | strecken | |
| 21 | Yes | Felsen | Nuss | Stahl |  | Deckel | Garten | Bauch | |
| 22 | Yes | fliegen | Schloss | Laken |  | Faden | Pinie | Spritze | |
| 23 | Yes | Geld | Stuhl | Nacht |  | Felsen | Nuss | Stahl | |
| 24 | Yes | kehren | Sessel | warm |  | fliegen | Schloss | Laken | |
| 25 | Yes | Krise | Gas | heiß |  | Geld | Stuhl | Nacht | |
| 26 | Yes | Land | Kredit | rot |  | Haus | Spur | weich | |
| 27 | Yes | lesen | Telefon | Club |  | kehren | Sessel | warm | |
| 28 | Yes | rein | Feuer | Fall |  | Krone | Gummi | Schatten | |
| 29 | Yes | Schädel | Hund | Splitter |  | Löwe | Sohn | Karte | |
| 30 | Yes | Schmerz | Ball | Kohl |  | Salz | Jungfrau | Frucht | |
| 31 | Yes | Stange | Fenster | Bühne |  | Schmerz | Ball | Kohl | |
| 32 | Yes | Stärke | Trompete | Donner |  | Schneide | Sinn | langweilig | |
| 33 | Yes | Stoff | Sand | Kartoffel |  | Seide | Eis | eben | |
| 34 | Yes | Wasser | stopfen | Detektiv |  | Stoff | Sand | Kartoffel | |
| 35 | Yes | Wein | klar | Auge |  | Wand | blind | Öl | |
| 36 | Yes | Ziege | Rücken | Predigt |  | Wasser | stopfen | Detektiv | |

| *Table H: English translation of the list of word triads used in Study 1.* | | | | | | | | | | |
| --- | --- | --- | --- | --- | --- | --- | --- | --- | --- | --- |
| List 1 | | | | |  | List 2 | | | | |
| Word 1 | Word 2 | Word 3 | Relation | Position |  | Word 1 | Word 2 | Word 3 | Relation | Position |
| Wine | Fountain | Champagne | Taxonomic | Third |  | Wine | Fountain | Cellar | Thematic | Third |
| Salami | Splitter | Pork chop | Taxonomic | Third |  | Salami | Splitter | Vegetarian | Thematic | Third |
| Diamond ring | Tennis | Bracelet | Taxonomic | Third |  | Diamond ring | Tennis | Altar | Thematic | Third |
| Can opener | Jacket | Bracelet | Taxonomic | Third |  | Can opener | Jacket | Can | Thematic | Third |
| Milk | Waltz | Lemonade | Taxonomic | Third |  | Milk | Waltz | Calcium | Thematic | Third |
| Virus | Luck | Bacteria | Taxonomic | Third |  | Virus | Luck | Doctor | Thematic | Third |
| Yacht | Club | Sailboat | Taxonomic | Third |  | Yacht | Club | Sea | Thematic | Third |
| Knife | Meaning | Pistole | Taxonomic | Third |  | Knife | Meaning | Fight | Thematic | Third |
| Cat | Pocket | Lion | Taxonomic | Third |  | Katze | Pocket | Ball of wool | Thematic | Third |
| French-fries | Hair | Potatoe Wedges | Taxonomic | Third |  | French-fries | Hair | Ketchup | Thematic | Third |
| Saxophone | Trumpet | Knot | Taxonomic | Second |  | Saxophon | Jazz | Knoten | Thematic | Second |
| Hot-Dog | Kebab | Danue | Taxonomic | Second |  | Hot Dog | Mustard | Donau | Thematic | Second |
| Demon | Ghost | Manners | Taxonomic | Second |  | Demon | Possession | Manners | Thematic | Second |
| Police Car | Fire Truck | Shade | Taxonomic | Second |  | Police car | Arrest | Shade | Thematic | Second |
| Spider | Wasp | Cloud | Taxonomic | Second |  | Spider | Widow | Cloud | Thematic | Second |
| Chalk | Marker | Cigarette | Taxonomic | Second |  | Chalk | Street | Cigarette | Thematic | Second |
| Pill | Capsule | Snow | Taxonomic | Second |  | Pill | Water | Snow | Thematic | Second |
| Hollywood | Los Angeles | Fruit | Taxonomic | Second |  | Hollywood | Filmstar | Fruit | Thematic | Second |
| Horse | Donkey | Cleaner | Taxonomic | Second |  | Horse | Rider | Cleaner | Thematic | Second |

| *Table H - Continued* | | | | | | | | | | | |
| --- | --- | --- | --- | --- | --- | --- | --- | --- | --- | --- | --- |
| List 1 | | | | |  | List 2 | | | | | |
| Word 1 | Word 2 | Word 3 | Relation | Position |  | Word 1 | Word 2 | Word 3 | Relation | Position |
| Turkey | Shop | USA | Thematic | Third |  | Turkey | Shop | Goose | Taxonomic | Third |
| Air craft | Lemon | Captain | Thematic | Third |  | Air craft | Lemon | Car | Taxonomic | Third |
| Pencil | Gasoline | Rubber | Thematic | Third |  | Pencil | Gasoline | Marker | Taxonomic | Third |
| Robbery | Edge | Bank | Thematic | Third |  | Robbery | Edge | Fraud | Taxonomic | Third |
| Gin | Noodle | Drunkenness | Thematic | Third |  | Gin | Noodle | Whisky | Taxonomic | Third |
| Panda | Praline | Tea | Thematic | Third |  | Panda | Praline | Grizzly | Taxonomic | Third |
| Camel | Traffic Light | Dune | Thematic | Third |  | Camel | Traffic Light | Dromedary | Taxonomic | Third |
| Pipe organ | Skull | Church | Thematic | Third |  | Pipe organ | Skull | Accordion | Taxonomic | Third |
| Swimming | Pine | Diving googles | Thematic | Third |  | Swimming | Pine | Golf | Taxonomic | Third |
| Crib | Window | Baby | Thematic | Third |  | Crib | Window | Water bed | Taxonomic | Third |
| Accident | Emergency lane | Floor | Thematic | Second |  | Accident | Misfortune | Floor | Taxonomic | Second |
| Beer | Party | Dog | Thematic | Second |  | Beer | Cola | Dog | Taxonomic | Second |
| Bee | Comb | Stage | Thematic | Second |  | Bee | Flee | Stage | Taxonomic | Second |
| Monastry | Book | Gas | Thematic | Second |  | Monstary | Cathedral | Gas | Taxonomic | Second |
| King | Crown Jewels | Sheet | Thematic | Second |  | King | President | Sheet | Taxonomic | Second |
| Tortilla-Chips | Salsa | Dealer | Thematic | Second |  | Tortilla-Chips | Potatoe-Chips | Dealer | Taxonomic | Second |
| Hawaii | Beach | Chair | Thematic | Second |  | Hawaii | Fidschi | Chair | Taxonomic | Second |
| Vase | Rose | Duration | Thematic | Second |  | Vase | Glass | Duration | Taxonomic | Second |
| Iglu | Inuit | Nut | Thematic | Second |  | Iglu | House | Nut | Taxonomic | Second |

*Notes.* Position indicates the position of the word that was related to the first word. Word triads were presented in a pseudorandomized order.

| *Table I. English Translation of the adapted word list presented in the thematic preference task (Study 2).* | | | | |
| --- | --- | --- | --- | --- |
| No | Target Word | Thematic Relation | Taxonomic Relation | Position |
| 1 | Saxophone | Jazz | Trumpet | left |
| 2 | Salami | Vegetarian | Pork chop | left |
| 3 | Accident | Emergency lane | Misfortune | left |
| 4 | Hot-dog | Mustard | Kebab | left |
| 5 | Demon | Possession | Ghost | left |
| 6 | Police car | Arrest | Fire truck | left |
| 7 | Spider | Widow | Wasp | left |
| 8 | Beer | Party | Cola | left |
| 9 | Bee | Comb | Fly | left |
| 10 | Gin | Drunkenness | Whisky | left |
| 11 | Monastry | Book | Cathedral | left |
| 12 | Panda | Tea | Grizzly | left |
| 13 | King | Crown jewels | President | left |
| 14 | Chalk | Street | Marker | left |
| 15 | Pill | Water | Capsule | left |
| 16 | Tortilla-chips | Potatoe-chips | Salsa | left |
| 17 | Hawai | Beach | Fidschi | left |
| 18 | Vase | Rose | Glass | left |
| 19 | Hollywood | Movie star | Los Angeles | left |
| 20 | Horse | Rider | Donkey | left |
| 21 | Igloo | Inuit | House | left |
| 22 | Wine | Cellar | Champagne | right |
| 23 | Turkey | USA | Goose | right |
| 24 | Diamondring | Altar | Bracelet | right |
| 25 | Can opener | Can | Bottle Opener | right |
| 26 | Milk | Calcium | Lemonade | right |
| 27 | Virus | Doctor | Bacteria | right |
| 28 | Aircraft | Captain | Car | right |
| 29 | Pencil | Rubber | Marker | right |
| 30 | Robbery | Bank | Fraud | right |
| 31 | Yacht | Sea | Sailboat | right |
| 32 | Camel | Dune | Dromedary | right |
| 33 | Knife | Fight | Pistole | right |
| 34 | Cat | Ball of wool | Lion | right |
| 35 | Pipe organ | Church | Accordion | right |
| 36 | Swimming | Diving googles | Golf | right |
| 37 | Crib | Baby | Waterbed | right |
| 38 | Waitress | Restaurant | Hairdresser | right |
| 39 | French-fries | Ketchup | Potatoe Wedges | right |
|  |  |  |  |  |

*Notes*. Position indicates the position of the thematically related word in the experiment. The related words were presented below the target word.

| *Table J: English translation of the word triads used in the semantic coherence task (Study 2)* | | | | |
| --- | --- | --- | --- | --- |
| No | Coherence | Word 1 | Word 2 | Word 3 |
| 1 | No | Stool | Thunder | Pool |
| 2 | No | Mirrow | Warm | Cap |
| 3 | No | Garden | Trumpet | Sign |
| 4 | No | cardboard | Cloth | Cream |
| 5 | No | Belly | Cross | Detective |
| 6 | No | Water | Telephone | Back |
| 7 | No | Sand | Sermon | Crown |
| 8 | No | Silk | Syringe | Red |
| 9 | No | Dance | Gold | Bogus |
| 10 | No | Fountain | Dreary | Traffic ligth |
| 11 | No | Land | Fall | Son |
| 12 | No | Poem | Money | Dust |
| 13 | No | Duration | Poke | Fruit |
| 14 | No | Strength | Coin | Clear |
| 15 | No | Rubber | Heaven | Night |
| 16 | No | Music | Cardboard | Gentlemen |
| 17 | No | Noodle | Chair | Crafting |
| 18 | No | Luck | Gasoline | Bank |
| 19 | No | Ample | Dealer | Knot |
| 20 | No | Key | Potatoe | Eye |
| 21 | No | Women | Ocean | Cream |
| 22 | No | Cleaner | Nut | Children |
| 23 | No | Switch | Head | Ring |
| 24 | No | Pure | Board | Spoon |
| 25 | No | Sheet | Cigarette | Snow |
| 26 | No | Stuff | Salt | Time |
| 27 | No | House | Flying | Tear drop |
| 28 | No | Printer | Statement | Oil |
| 29 | No | Manners | Soft | Shade |
| 30 | No | Free | Sweep | Blade |
| 31 | No | Sign | Cabbage | Strecht |
| 32 | No | Hair | Club | Blind |
| 33 | Yes | Switch | Fountain | Beam |
| 34 | Yes | Knot | Worm | Noodle |
| 35 | Yes | Cardboard | Praline | Cigarette |
| 36 | Yes | Duration | Ocean | Danube |
| 37 | Yes | Jacket | Cream | Cloud |
| 38 | Yes | Water | Stuff | Detective |
| 39 | Yes | Arm | Pocket | Time |
| 40 | Yes | Ache | Ball | Cabbage |
| 41 | Yes | Wall | Blind | Oil |
| 42 | Yes | Blade | Meaning | Dreary |
| 43 | Yes | Lion | Son | Card |
| 44 | Yes | Threat | Pine | Syringe |
| 45 | Yes | Manners | Leg | Tennis |
| 46 | Yes | Reading | Telephone | Club |
| 47 | Yes | Skull | Dog | Spiltter |
| 48 | Yes | Salt | Virgin | Fruit |
| *Table J - Continued* | | | | |
| No | Coherence | Word 1 | Word 2 | Word 3 |
| 49 | Yes | Sweep | Chair | Warm |
| 50 | Yes | House | Trace | Soft |
| 51 | Yes | Pure | Fire | Fall |
| 52 | Yes | Head | Teardrop | Socket |
| 53 | Yes | Flying | Castle | Sheet |
| 54 | Yes | Strike | Children | Board |
| 55 | Yes | Rock | Nut | Steel |
| 56 | Yes | Pen | Cross | Heart |
| 57 | Yes | Gasoline | Mirrow | Sign |
| 58 | Yes | Breath | Hair | Stretch |
| 59 | Yes | Silk | Cream | Even |
| 60 | Yes | Cloth | Sand | Potatoe |
| 61 | Yes | Coin | Spoon | Ring |
| 62 | Yes | Cap | Garden | Belly |
| 63 | Yes | Money | Stool | Night |
| 64 | Yes | Wood | Women | Master |

| *Table K. German and English word triads of data set A (Study 3).* | | | | | | | | |
| --- | --- | --- | --- | --- | --- | --- | --- | --- |
| German Word Triads | | | | |  | English Translation | | |
| No | Word 1 | Word 2 | Word 3 | Denominator |  | Word 1 | Word 2 | Word 3 |
| 1 | Ziege | hoch | grün | Yes |  | Goat | High | Green |
| 2 | zerbrochen | klar | Auge | Yes |  | Broken | Clear | Eye |
| 3 | Zeit | Haar | strecken | Yes |  | Time | Hair | Strech |
| 4 | Vogel | Seiten | Butter | Yes |  | Bird | Pages | Butter |
| 5 | trödeln | gehen | Sirup | Yes |  | Poke | Go | Molasses |
| 6 | trocken | Kopf | Hund | Yes |  | Dry | Head | Dog |
| 7 | Treffer | Gleichstand | Tennis | Yes |  | Strike | Same | Tennis |
| 8 | Tönung | Haar | Öl | Yes |  | Tinting | Hair | Oil |
| 9 | Tinte | Kreuz | Herz | Yes |  | Ink | Cross | Heart |
| 10 | Stoff | elend | Kartoffel | Yes |  | Cloth | Misery | Potatoe |
| 11 | Stein | Tür | Straße | Yes |  | Stone | Door | Street |
| 12 | spielen | Kredit | Gruß | Yes |  | Playing | Credit | Report |
| 13 | Seide | Eis | eben | Yes |  | Silk | Cream | Even |
| 14 | Schneide | Amputation | langweilig | Yes |  | Blade | Amputation | Dreary |
| 15 | Schmerz | Jäger | Kohl | Yes |  | Ache | Hunter | Cabbage |
| 16 | Schein | Laden | Händler | Yes |  | Ticket | Shop | Broker |
| 17 | Sandwich | Golf | Herren | Yes |  | Sandwich | Golf | Gentleman |
| 18 | Salz | Tief | Gischt | Yes |  | Salt | Deep | Foam |
| 19 | Rohr | Holz | heiß | Yes |  | Pipe | Wood | Hot |
| 20 | Riemen | Tasche | Zeit | Yes |  | Strap | Pocket | Time |
| 21 | rein | blau | Fall | Yes |  | Pure | Blue | Fall |
| 22 | Rechteck | Telefon | Club | Yes |  | Square | Telefon | Club |
| 23 | Pappe | Quadrat | offen | Yes |  | Cardboard | Square | Open |
| 24 | Manieren | rund | Tennis | Yes |  | Manners | Round | Tennis |
| 25 | Magie | Plüsch | Fußboden | Yes |  | Magic | Plush | Floor |
| 26 | leer | weiß | Linien | Yes |  | Blank | White | Lines |
| 27 | laut | Trompete | Atom | Yes |  | Loud | Trumpet | Atomic |
| 28 | Kirche | Licht | Geburtstag | Yes |  | Church | Light | Birthday |
| 29 | Kaninchen | Wolke | Sahne | Yes |  | Rabbit | Cloud | house |
| 30 | groß | Blatt | Schatten | Yes |  | Big | Leaf | Shade |
| 31 | Geld | Stuhl | Kellner | Yes |  | Gold | Stool | Tender |
| 32 | Fuß | Schnee | Tanz | Yes |  | Foot | Snow | Dance |
| 33 | Felsen | Ware | Stahl | Yes |  | Rock | Ware | Steel |
| 34 | Faß | Garten | Bauch | Yes |  | Barrel | Root | Belly |
| 35 | Faden | Pinie | Schmerz | Yes |  | Threat | Pine | Pain |
| 36 | Engpass | Flug | hochwerfen | Yes |  | Notch | Flight | Spin |
| 37 | Wolke | Blatt | Pfand | No |  | Cloud | Leaf | Pawn |
| 38 | Ware | Kehle | gehen | No |  | Ware | Throat | Go |
| 39 | Vogel | Rohr | Straße | No |  | Bird | Pipe | Street |
| 40 | anhalten | Tür | Sahne | No |  | Stop | Door | Cream |
| 41 | Trompete | Badewanne | Kredit | No |  | Trumpet | Bathhub | Credit |
| 42 | trocken | Laden | Tennis | No |  | Dry | Shop | Tennis |
| 43 | traurig | Münze | eben | No |  | Sad | Coin | Plain |
| 44 | Traum | Ball | Buch | No |  | Dream | Ball | Book |
| 45 | Stadt | Wurzel | Auto | No |  | Town | Root | Car |
| 46 | Seide | Stein | Ziege | No |  | Silk | Stone | Goat |
| 47 | schwer | Farben | Stoß | No |  | Hard | Colors | Poke |
| 48 | Schwan | Armee | Maske | No |  | Swan | Army | Mask |

| *Table K- Continued* | | | | | | | | | |
| --- | --- | --- | --- | --- | --- | --- | --- | --- | --- |
| German Word Triad | | | | |  | English Translation | | |
| No | Word 1 | Word 2 | Word 3 | Denominator |  | Word 1 | Word 2 | Word 3 | |
| 49 | schlau | heiß | strecken | No |  | Smart | Hot | Strech | |
| 50 | ruhig | Seiten | Musik | No |  | Still | Pages | Music | |
| 51 | Party | rund | Mark | No |  | Party | Round | Mark | |
| 52 | Nagel | Faden | spielen | No |  | Nail | Threat | Play | |
| 53 | Messer | Fuß | Schachtel | No |  | Knife | Foot | Box | |
| 54 | Magie | bellen | Kredit | No |  | Magic | Bark | Credit | |
| 55 | Mädchen | sozial | Horn | No |  | Girl | Social | Bugle | |
| 56 | Liebe | Boden | Schmerz | No |  | Love | Floor | Pain | |
| 57 | Licht | Volk | Kopf | No |  | Light | Folk | Head | |
| 58 | Lärm | Rauch | Schatten | No |  | Noise | Fume | Shade | |
| 59 | Kopf | sehen | Träne | No |  | Head | Look | Tear | |
| 60 | klar | rollen | Macht | No |  | Clear | Roll | Force | |
| 61 | Kekse | leer | Zügel | No |  | Cookies | Blank | Curb | |
| 62 | Haus | Löwe | Butter | No |  | House | Lion | Butter | |
| 63 | Gürtel | Handel | Nase | No |  | Belt | Deal | Nose | |
| 64 | groß | Haar | Schotte | No |  | Big | Hair | Scotch | |
| 65 | Gold | Cracker | Rad | No |  | Gold | Cracker | Wheel | |
| 66 | Führer | Schere | weiß | No |  | Leader | Scissors | White | |
| 67 | fröhlich | Schwein | Engel | No |  | Jolly | Pig | Angel | |
| 68 | Finger | sprechen | Wurm | No |  | Finger | Speak | Worm | |
| 69 | Deck | Schemel | Tasche | No |  | Deck | Stool | Pocket | |
| 70 | Bonbons | Giebel | Stadt | No |  | Candy | Gable | Town | |
| 71 | Bewegung | blau | Tasche | No |  | Motion | Blue | Bag | |
| 72 | Vogel | Hering | Dampf | No |  | Bird | Herring | Steam | |

| *Table L. German and English word triads of data set B (Study 3).* | | | | | | | | |
| --- | --- | --- | --- | --- | --- | --- | --- | --- |
| German Word Triad | | | | |  | English Translation | | |
| No | Word 1 | Word 2 | Word 3 | Denominator |  | Word 1 | Word 2 | Word 3 |
| 1 | Ziege | hoch | grün | Yes |  | Goat | High | Green |
| 2 | Tönung | Haar | Öl | Yes |  | Tinting | Hair | Oil |
| 3 | Pappe | Quadrat | offen | Yes |  | Cardboard | Square | Open |
| 4 | leer | weiß | Linien | Yes |  | Blank | White | Line |
| 5 | Schein | Laden | Händler | Yes |  | Ticket | Shop | Broker |
| 6 | groß | Blatt | Schatten | Yes |  | Big | Leaf | Shade |
| 7 | Seide | Eis | eben | Yes |  | Silk | Cream | Even |
| 8 | Kirche | Licht | Geburtstag | Yes |  | Church | Light | Birthday |
| 9 | Blume | Wachs | gelb | Yes |  | Flower | Wax | Yellow |
| 10 | Kaninchen | Wolke | Sahne | Yes |  | Rabbit | Cloud | House |
| 11 | zerbrochen | klar | Auge | Yes |  | Broken | Clear | Eye |
| 12 | Faß | Garten | Bauch | Yes |  | Barrel | Root | Belly |
| 13 | Nase | Finger | Taschentuch | Yes |  | Nose | Finger | Hanky |
| 14 | Papier | Party | Locher | Yes |  | Paper | Party | Punch |
| 15 | Bleistift | Papier | Blume | Yes |  | Pencil | Paper | Flower |
| 16 | Duft | Rot | Blume | Yes |  | Scent | Read | Flower |
| 17 | Holz | Glas | Rahmen | Yes |  | Wood | Glas | Frame |
| 18 | Musik | Menschen | Ticket | Yes |  | Music | People | Ticket |
| 19 | grün | Nadel | Kerze | Yes |  | Green | Needle | Candle |
| 20 | Feuer | Wasser | rot | Yes |  | Fire | Water | Read |
| 21 | Schminke | Vorhang | Applaus | Yes |  | Make-up | Curtain | Applause |
| 22 | Salz | Löffel | Huhn | Yes |  | Salt | Spoon | Chicken |
| 23 | Gras | Tisch | Sommer | Yes |  | Grass | Table | Summer |
| 24 | Wolle | weich | Wäsche | Yes |  | Wool | Soft | Laundry |
| 25 | Kugel | Schere | Nase | No |  | Blank | White | Lines |
| 26 | Schere | Rohr | Pfeil | No |  | Scissor | Pipe | Arrow |
| 27 | Nase | Blume | Papier | No |  | Nose | Flower | Paper |
| 28 | Duft | Locher | Finger | No |  | Scent | Punch | Finger |
| 29 | Locher | Glas | Rot | No |  | Punch | Glass | Read |
| 30 | Roher | Ticket | Butter | No |  | Pipe | Ticket | Butter |
| 31 | gelb | Straße | Holz | No |  | Yellow | Street | Wood |
| 32 | Wasser | Kerze | Musik | No |  | Water | Candle | Music |
| 33 | Vorhang | Wasser | gelb | No |  | Curtain | Water | Yellow |
| 34 | Löffel | Ticket | Löwe | No |  | Spoon | Ticket | Lion |
| 35 | Uhr | Tisch | Gras | No |  | Watch | Desk | Grass |
| 36 | Sommer | sprechen | eben | No |  | Summer | Speak | Even |
| 37 | Vogel | Rohr | Straße | No |  | Bird | Pipe | Street |
| 38 | Vogel | Hering | Dampf | No |  | Bird | Herring | Steam |
| 39 | Stadt | Wurzel | Auto | No |  | Town | Root | Car |
| 40 | Mädchen | sozial | Horn | No |  | Girl | Social | Bugle |
| 41 | Haus | Löwe | Butter | No |  | House | Lion | Butter |
| 42 | Finger | sprechen | Wurm | No |  | Finger | Speak | Worm |
| 43 | anhalten | Tür | Sahne | No |  | Stop | Door | Cream |
| 44 | Nagel | Faden | spielen | No |  | Nail | Thread | Playing |
| 45 | Kekse | leer | Zügel | No |  | Cookies | Lank | Curb |
| 46 | Bewegung | blau | Tasche | No |  | Motion | Blue | Bag |
| 47 | traurig | Münze | eben | No |  | Sad | Coin | Plain |
| 48 | Magie | bellen | Kredit | No |  | Magic | Gark | Grant |

| *Table M. German and English word triads of data set C (Study 3).* | | | | | | | | |
| --- | --- | --- | --- | --- | --- | --- | --- | --- |
| German Word Triad | | | | |  | English Translation | | | |
| No | Word 1 | Word 2 | Word 3 | Denominator |  | Word 1 | Word 2 | Word 3 | |
| 1 | Ziege | Rücken | Predigt | Yes |  | Goat | Back | Sermon | |
| 2 | Salz | Jungfrau | Frucht | Yes |  | Salt | Virgin | Fruit | |
| 3 | Wand | blind | Öl | Yes |  | Wall | Blind | Oil | |
| 4 | Pappe | Praline | Zigarette | Yes |  | Cardboard | Praline | Cigarette | |
| 5 | basteln | leer | Drucker | Yes |  | Crafting | Empty | Printer | |
| 6 | Schein | Laden | Händler | Yes |  | Bogus | Store | Dealer | |
| 7 | Krone | Gummi | Schatten | Yes |  | Crown | Rubber | Shade | |
| 8 | Seide | Eis | eben | Yes |  | Silk | Cream | Even | |
| 9 | Reiniger | Plüsch | Fußboden | Yes |  | Cleaner | Plush | Floor | |
| 10 | Kittel | Sahne | Wolke | Yes |  | Jacket | Cream | Cloud | |
| 11 | Krise | Gas | heiß | Yes |  | Crisis | Gas | Hot | |
| 12 | lesen | Telefon | Club | Yes |  | Reading | Telephone | Club | |
| 13 | Ampel | Seiten | Zitrone | Yes |  | Traffic light | Page | Lemon | |
| 14 | trödeln | schlurfen | Walzer | Yes |  | Poke | Ample | Waltz | |
| 15 | Wein | klar | Auge | Yes |  | Wine | Clear | Eye | |
| 16 | Deckel | Garten | Bauch | Yes |  | Cap | Garden | Belly | |
| 17 | rein | Feuer | Fall | Yes |  | Pure | Fire | Fall | |
| 18 | Holz | Frau | Meister | Yes |  | ood | Women | Master | |
| 19 | Manieren | Bein | Tennis | Yes |  | Manners | Leg | Tennis | |
| 20 | Arm | Tasche | Zeit | Yes |  | Arm | Pocket | Time | |
| 21 | Atem | Haar | strecken | Yes |  | Breath | Hair | Strech | |
| 22 | Fuß | Schnee | Tanz | Yes |  | Feet | Snow | Dance | |
| 23 | Schädel | Hund | Splitter | Yes |  | Skull | Dog | Splitter | |
| 24 | Felsen | Nuss | Stahl | Yes |  | Rock | Nut | Steel | |
| 25 | Schneide | Sinn | langweilig | Yes |  | Blade | Meaning | Dreary | |
| 26 | Geld | Stuhl | Nacht | Yes |  | Money | Stool | Night | |
| 27 | Land | Kredit | rot | Yes |  | Land | Credit | Red | |
| 28 | Faden | Pinie | Spritze | Yes |  | Threat | Pine | Syringe | |
| 29 | Stärke | Trompete | Donner | Yes |  | Strength | Trumpet | Thunder | |
| 30 | Schmerz | Ball | Kohl | Yes |  | Ache | Ball | Cabbage | |
| 31 | feiern | Golf | Herren | Yes |  | Celebrate | Golf | Gentlemen | |
| 32 | Treffer | Kinder | Brett | Yes |  | Strike | Children | Board | |
| 33 | Stoff | Sand | Kartoffel | Yes |  | Cloth | Sand | Potatoe | |
| 34 | Stift | Kreuz | Herz | Yes |  | Pen | Cross | Heart | |
| 35 | Stange | Fenster | Bühne | Yes |  | Pole | Window | Stage | |
| 36 | fliegen | Schloss | Laken | Yes |  | Flying | Castle | Sheet | |
| 37 | Wasser | stopfen | Detektiv | Yes |  | Water | Stuff | Detective | |
| 38 | Dauer | Ozean | Donau | Yes |  | Duration | Ocean | Danube | |
| 39 | Haus | Spur | weich | Yes |  | House | Trace | Soft | |
| 40 | kehren | Sessel | warm | Yes |  | Sweep | Chair | Warm | |
| 41 | Schalter | Quelle | Strahl | Yes |  | Switch | Fountain | Beam | |
| 42 | Staub | Himmel | Zeichen | Yes |  | Dust | Heaven | Sign | |
| 43 | Knoten | Wurm | Nudel | Yes |  | Knot | Worm | Noodle | |
| 44 | Münze | Löffel | Ring | Yes |  | Coin | Spoon | Ring | |
| 45 | Benzin | Spiegel | Schild | Yes |  | Gasoline | Mirrow | Sign | |
| 46 | Kopf | Träne | Höhle | Yes |  | Head | Teardrop | Socket | |
| 47 | Löwe | Sohn | Karte | Yes |  | Lion | Son | Card | |
| 48 | Bank | Musik | Schlüssel | Yes |  | Bank | Music | Key | |

| *Table M- continued*. | | | | | | | | |
| --- | --- | --- | --- | --- | --- | --- | --- | --- |
| German Word Triad | | | | |  | English Translation | | | |
| No | Word 1 | Word 2 | Word 3 | Denominator |  | Word 1 | Word 2 | Word 3 | |
| 49 | Erklärung | Gedicht | Glück | Yes |  | Statement | Poem | luck | |
| 50 | Warnung | frei | Drang | Yes |  | Warning | Free | Urge | |
| 51 | Splitter | Laden | Tennis | No |  | Splitter | Store | Tennis | |
| 52 | Kittel | Walzer | Schädel | No |  | Jacket | Waltz | Skull | |
| 53 | Glück | Benzin | Bank | No |  | Luck | Gasoline | Bank | |
| 54 | frei | kehren | Schneide | No |  | Free | Sweep | Blade | |
| 55 | Quelle | langweilig | Ampel | No |  | Fountain | Dreary | Traffic light | |
| 56 | Sinn | Tasche | Zitrone | No |  | Meaning | Pocket | Lemon | |
| 57 | Arm | Pinie | Fenster | No |  | Arm | Pine | Window | |
| 58 | Haar | Club | blind | No |  | Hair | Club | Blind | |
| 59 | schlurfen | Händler | Knoten | No |  | Ample | Dealer | Knot | |
| 60 | Fußboden | Feuer | Donau | No |  | Floor | Fire | Danube | |
| 61 | Manieren | weich | Schatten | No |  | Manners | Soft | Shade | |
| 62 | Wolke | Hund | feiern | No |  | Cloud | Dog | Celebrate | |
| 63 | Bühne | Gas | Praline | No |  | Stage | Gas | Praline | |
| 64 | Laken | Zigarette | Schnee | No |  | Sheet | Cigarette | Snow | |
| 65 | Nudel | Sessel | basteln | No |  | Noodle | Chair | Crafting | |
| 66 | Dauer | trödeln | Frucht | No |  | Duration | Poke | Fruit | |
| 67 | Reiniger | Nuss | Kinder | No |  | Cleaner | Nut | Children | |
| 68 | stopfen | Salz | Zeit | No |  | Stuff | Salt | Time | |
| 69 | Faden | Löwe | Krise | No |  | Threat | Lion | Crisis | |
| 70 | Gummi | Himmel | Nacht | No |  | Rubber | Heaven | Night | |
| 71 | Drang | Stahl | Ziege | No |  | Urge | Steel | Goat | |
| 72 | Schlüssel | Kartoffel | Auge | No |  | Key | Potatoe | Eye | |
| 73 | Frau | Ozean | Sahne | No |  | Women | Ocean | Cream | |
| 74 | Garten | Trompete | Schild | No |  | Garden | Trumpet | Sign | |
| 75 | Wasser | Telefon | Rücken | No |  | Water | Telephone | Back | |
| 76 | rein | Brett | Löffel | No |  | Pure | Board | Spoon | |
| 77 | Seide | Spritze | rot | No |  | Silk | Syringe | Red | |
| 78 | Felsen | Plüsch | leer | No |  | Rock | Plush | Empty | |
| 79 | Bauch | Kreuz | Detektiv | No |  | Belly | Cross | Detective | |
| 80 | Spiegel | warm | Deckel | No |  | Mirrow | Warm | Cap | |
| 81 | Stuhl | Donner | Stange | No |  | Stool | Thunder | Pool | |
| 82 | Schloss | Seiten | Bein | No |  | Castle | Page | Leg | |
| 83 | Ball | Wein | Wurm | No |  | Ball | Wine | Worm | |
| 84 | Meister | Schmerz | eben | No |  | Master | Ache | Even | |
| 85 | Atem | Kredit | Holz | No |  | Breath | Credit | Wood | |
| 86 | Zeichen | Kohl | strecken | No |  | Sign | Cabbage | Strech | |
| 87 | Stärke | Münze | klar | No |  | Strength | Coin | Clear | |
| 88 | Karte | Stoff | Eis | No |  | Card | Cloth | Cream | |
| 89 | Sand | Predigt | Krone | No |  | Sand | Sermon | Crown | |
| 90 | Treffer | Warnung | Spur | No |  | Strike | Warning | Trace | |
| 91 | Herz | lesen | heiß | No |  | Heart | Reading | Hot | |
| 92 | Strahl | Jungfrau | Wand | No |  | Beam | Virgin | Wall | |
| 93 | Gedicht | Geld | Staub | No |  | Poem | Money | Dust | |
| 94 | Haus | fliegen | Träne | No |  | House | Flying | Tear drop | |

| *Table M- continued*. | | | | | | | | |
| --- | --- | --- | --- | --- | --- | --- | --- | --- |
| German Word Triad | | | | |  | English Translation | | | |
| No | Word 1 | Word 2 | Word 3 | Denominator |  | Word 1 | Word 2 | Word 3 | |
| 95 | Fuß | Stift | Höhle | No |  | Feet | Pencil | Socket | |
| 96 | Musik | Pappe | Herren | No |  | Music | Cardboard | Gentlemen | |
| 97 | Drucker | Erklärung | Öl | No |  | Printer | Statement | Oil | |
| 98 | Land | Fall | Sohn | No |  | Land | Fall | Son | |
| 99 | Tanz | Golf | Schein | No |  | Dance | Golf | Bogus | |
| 100 | Schalter | Kopf | Ring | No |  | Switch | Head | Ring | |

| *Table N. English Translation of the Word triads of the two triad lists (Study 4).* | | | | | | | | |
| --- | --- | --- | --- | --- | --- | --- | --- | --- |
|  |  | Control Triad List | | |  | Manipulated Triad List | | | |
| No | Deno-minator | Word 1 | Word 2 | Word 3 |  | Word 1 | Word 2 | Word 3 | |
| 1 | No | Breath | Creoit | Wood |  | Belly | Cross | Detective | |
| 2 | No | Threat | Lion | Crisis |  | Duration | Poke | Fruit | |
| 3 | No | Women | Ocean | Cream |  | Women | Ocean | Cream | |
| 4 | No | Floor | Fire | Danue |  | Poem | Money | Dust | |
| 5 | No | Garden | Trumpet | Sign |  | Luck | Gasoline | Bank | |
| 6 | No | Poem | Money | Dust |  | Rubber | Heaven | Night | |
| 7 | No | Card | Cloth | Cream |  | Heart | Reading | Hot | |
| 8 | No | Jacket | Waltz | Skull |  | Card | Cloth | Cream | |
| 9 | No | Sheet | Cigarette | Snow |  | Land | Fall | Son | |
| 10 | No | Land | Fall | Son |  | Pure | Board | Spoon | |
| 11 | No | Manners | Soft | Shade |  | Sand | Sermon | Crown | |
| 12 | No | Castle | Page | Leg |  | Switch | Head | Ring | |
| 13 | No | Key | Potatoe | Eye |  | Silk | Syringe | Red | |
| 14 | No | Meaning | Pocket | Lemon |  | Mirrow | Warm | Cap | |
| 15 | No | Stuff | Salt | Time |  | Strength | Coin | Clear | |
| 16 | No | Beam | Virgin | Wall |  | Dance | Golf | Bogus | |
| 17 | No | Cloud | Dog | Celebrate |  | Strike | Warning | Trace | |
| 18 | No | Breath | Hair | Strech |  | Sign | Cabbage | Strech | |
| 19 | Yes | Crafting | Empty | Printer |  | Traffic ligth | Page | Lemon | |
| 20 | Yes | Rock | Nut | Steel |  | Breath | Hair | Strech | |
| 21 | Yes | Flying | Castle | Sheet |  | Cap | Garden | Belly | |
| 22 | Yes | Money | Stool | Night |  | Threat | Pine | Syringe | |
| 23 | Yes | Money | Stool | Night |  | Rock | Nut | Steel | |
| 24 | Yes | Sweep | Chair | Warm |  | Flying | Castle | Sheet | |
| 25 | Yes | Crisis | Gas | Hot |  | Money | Stool | Night | |
| 26 | Yes | Land | Credit | Red |  | House | Trace | Soft | |
| 27 | Yes | Reading | Telepone | Club |  | Sweep | Chair | Warm | |
| 28 | Yes | Pure | Fire | Fall |  | Crown | Rubber | Shade | |
| 29 | Yes | Skull | Dog | Splitter |  | Lion | Son | Card | |
| 30 | Yes | Ache | Ball | Cabbage |  | Salt | Virigin | Fruit | |
| 31 | Yes | Pole | Window | Stage |  | Ache | Ball | Cabbage | |
| 32 | Yes | Strength | Trumpet | Thunder |  | Blade | Meaning | Dreary | |
| 33 | Yes | Cloth | Sand | Potatoe |  | Silk | Cream | Even | |
| 34 | Yes | Water | Stuff | Detective |  | Cloth | Sand | Potatoe | |
| 35 | Yes | Wine | Clear | Eye |  | Wall | Blind | Oil | |
| 36 | Yes | Goat | Back | Sermon |  | Water | Stuff | Detective | |
